# Supplementary material for: Single molecule tracking reveals functions for RarA at replication forks but also independently from replication during DNA repair in Bacillus subtilis
Source: PubMed Central journal article supplement (PMC6374455; doi:10.1038/s41598-018-38289-6), 2019-02-13
Supplement: 41598_2018_38289_MOESM1_ESM.pdf [file 41598_2018_38289_MOESM1_ESM.pdf]

## Supplementary Material

### Single molecule tracking reveals functions for RarA at replication forks but also independently from replication during DNA repair in *Bacillus subtilis*

Hector Romero<sup>1,2,3</sup>, Thomas C. Rösch<sup>1,2</sup>, Rogelio Hernández-Tamayo<sup>1,2</sup>, Daniella Lucena<sup>1,2</sup>, Silvia Ayora<sup>3</sup>, Juan C. Alonso<sup>3\*</sup>, Peter L. Graumann<sup>1,2\*</sup>

<sup>1</sup>SYNMIKRO, LOEWE-Zentrum für Synthetische Mikrobiologie, Hans-Meerwein-Straße, Mehrzweckgebäude, 35043 Marburg, <sup>2</sup>Fachbereich Chemie, Hans-Meerwein-Straße 4, 35032 Marburg, Germany, <sup>3</sup>Department Microbial Biotechnology, Centro Nacional de Biotecnología, CNB-CSIC, 3 Darwin St., 28049 Cantoblanco, Madrid, Spain.

Table S1A. *Bacillus subtilis* strains used

| Strains | Genotype                 | source | Source/parent strain | Strains | Relevant genotype             | Source    |
|---------|--------------------------|--------|----------------------|---------|-------------------------------|-----------|
| BG214   | + wild type <sup>a</sup> |        |                      | BG1067  | + $\Delta rarA$               | This work |
| BG190   | + $\Delta recA$          |        | 1                    | BG1555  | + $\Delta recA, \Delta rarA$  | This work |
| BG439   | + $\Delta recO$          |        | 2                    | BG1433  | + $\Delta recO, \Delta rarA$  | This work |
| BG129   | + $recF15$               |        | 3                    | BG1055  | + $recF15, \Delta rarA$       | This work |
| BG1455  | + $\Delta recD2$         |        | 4                    | BG1421  | + $\Delta recD2, \Delta rarA$ | This work |
| BG1065  | + $\Delta recX$          |        | 5                    | BG1371  | + $\Delta recX, \Delta rarA$  | This work |
| BG1337  | + $\Delta addAB$         |        | 6                    | BG1107  | + $\Delta addAB, \Delta rarA$ | This work |
| BG675   | + $\Delta recJ$          |        | 7                    | BG1059  | + $\Delta recJ, \Delta rarA$  | This work |
| BG705   | + $\Delta recQ$          |        | 7                    | BG1575  | + $\Delta recQ, \Delta rarA$  | This work |
| BG425   | + $\Delta recS$          |        | 7                    | BG1563  | + $\Delta recS, \Delta rarA$  | This work |
| BG855   | + $\Delta recU$          |        | 8                    | BG1083  | + $\Delta recU, \Delta rarA$  | This work |
| BG1131  | + $\Delta recG$          |        | 9                    | BG1103  | + $\Delta recG, \Delta rarA$  | This work |
| BG703   | + $\Delta ruvAB$         |        | 10                   | BG1351  | + $\Delta ruvAB, \Delta rarA$ | This work |
| BG1245  | + $\Delta radA$          |        | 11                   | BG1373  | + $\Delta radA, \Delta rarA$  | This work |
| BG905   | + $\Delta polY1$         |        | 12                   | BG1401  | + $\Delta polY1, \Delta rarA$ | This work |
| BG907   | + $\Delta polY2$         |        | 12                   | BG1403  | + $\Delta polY1, \Delta rarA$ | This work |
| BG193   | + $dnaB37$               |        | 13                   | BG1687  | + $dnaB37, \Delta rarA$       | This work |
| BG196   | + $dnaC30$               |        | 13                   | BG1681  | + $dnaC30, \Delta rarA$       | This work |
| BG198   | + $dnaG20$               |        | 13                   | BG1661  | + $dnaG20, \Delta rarA$       | This work |
| BG199   | + $dnaF33$               |        | 13                   | BG1685  | + $dnaF33, \Delta rarA$       | This work |
| BG201   | + $dnaX51$               |        | 13                   | BG1659  | + $dnaX51, \Delta rarA$       | This work |
| BG1679  | + $dnaE58$               |        | This work            | BG1683  | + $dnaE58, \Delta rarA$       | This work |

<sup>a</sup>*trpCE metA5 amyE1 ytsJ1 rsbV37 xre1 xkdA1 att<sup>SPB</sup> att<sup>ICEBs1</sup>*

Table S1B. *B. subtilis rarA-yfp* and its mutant variants

| Strains <sup>a</sup> | Relevant genotype                                   | Source    |
|----------------------|-----------------------------------------------------|-----------|
| BG1331               | + <i>rarA-yfp</i>                                   | This work |
| PG3171               | + <i>rarA-mVenus</i>                                | This work |
| BG1445               | + <i>rarA-yfp</i> , $\Delta recO$                   | This work |
| BG1345               | + <i>rarA-yfp</i> , <i>recF15</i>                   | This work |
| BG1347               | + <i>rarA-yfp</i> , $\Delta recD2$                  | This work |
| BG1349               | + <i>rarA-yfp</i> , $\Delta recX$                   | This work |
| PG3316               | + <i>rarA-yfp</i> , $\Delta addAB$                  | This work |
| PG3423               | + <i>rarA-yfp</i> , $\Delta recJ$                   | This work |
| PG3318               | + <i>rarA-yfp</i> , $\Delta recQ$                   | This work |
| PG3424               | + <i>rarA-yfp</i> , $\Delta recS$                   | This work |
| BG1443               | + <i>rarA-yfp</i> , $\Delta recU$                   | This work |
| PG3317               | + <i>rarA-yfp</i> , $\Delta recG$                   | This work |
| PG3426               | + <i>rarA-yfp</i> , $\Delta ruvAB$                  | This work |
| PG3429               | + <i>rarA-yfp</i> , $\Delta radA$                   | This work |
| PG3427               | + <i>rarA-yfp</i> , $\Delta polY1$                  | This work |
| PG3428               | + <i>rarA-yfp</i> , $\Delta polY2$                  | This work |
| PG3174               | + <i>rarA-yfp</i> , <i>dnaX-cfp</i>                 | This work |
| BG1451               | + <i>rarA-yfp</i> , <i>dnaB37</i>                   | This work |
| BG1453               | + <i>rarA-yfp</i> , <i>dnaC30</i>                   | This work |
| PG3430               | + <i>rarA-yfp</i> , <i>dnaB37</i> , <i>dnaX-cfp</i> | This work |
| PG3431               | + <i>rarA-yfp</i> , <i>dnaC30</i> , <i>dnaX-cfp</i> | This work |

<sup>a</sup>All strains are derivatives of *B. subtilis* BG214 (*trpCE metA5 amyE1 ytsJ1 rsbV37 xre1 xkdA1 att<sup>SPB</sup> att<sup>ICEBs1</sup>*)

Movie S1: Exponentially growing cells expressing RarA-mVenus as sole source of the protein, images taken every 3 minutes. Shown are overlays of bright field and mVenus (variant of YFP) fluorescence (shown in yellow) images. 4 frames per second, White bar 5  $\mu$ m. Note that the cells grow in short chains of cells.

Figure S1

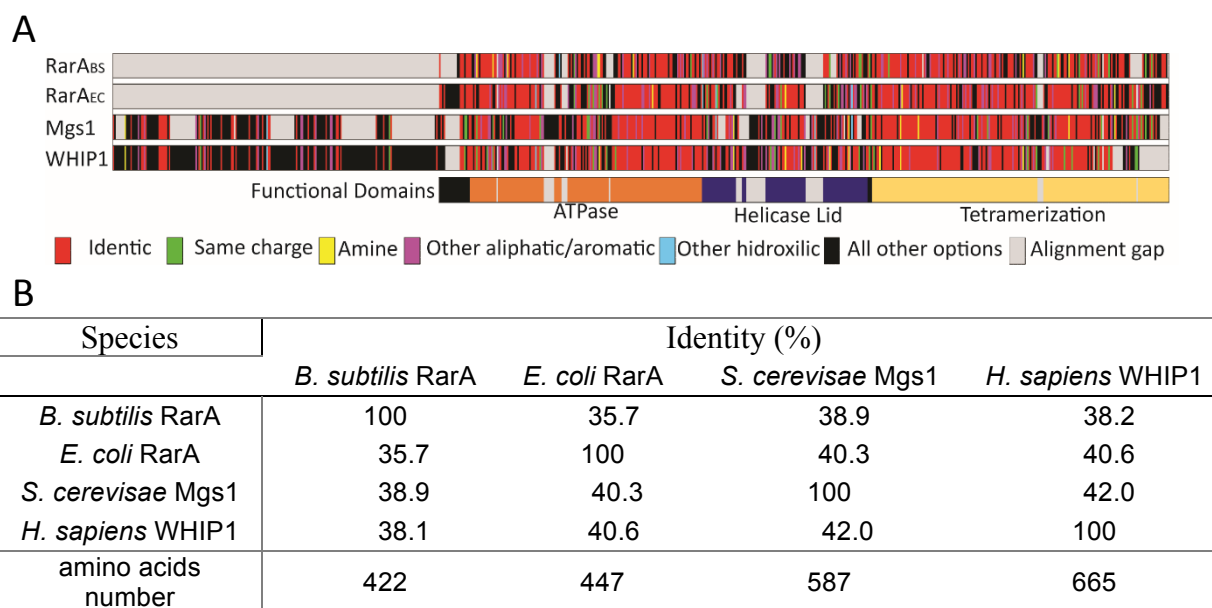

**Figure S1.** Comparison of RarA protein family (A) BLASTA for the sequences obtained in NCBI database and the functional domains predicted by Page *et al.*<sup>14</sup> for *E. coli* RarA. Color-code represent the identities or the type of minor changes (polar with same charge, green; amine, yellow; or same kind of side chain, pink and blue). Figure is scaled to the size of proteins except of the gap needed for alignment. (B) Identity values for RarA homologues in evolution. The protein increases its size in eukaryotes, the identity is conserved

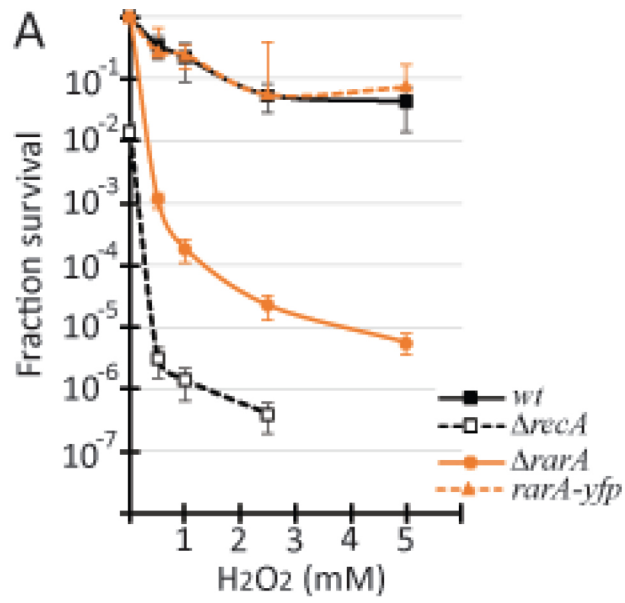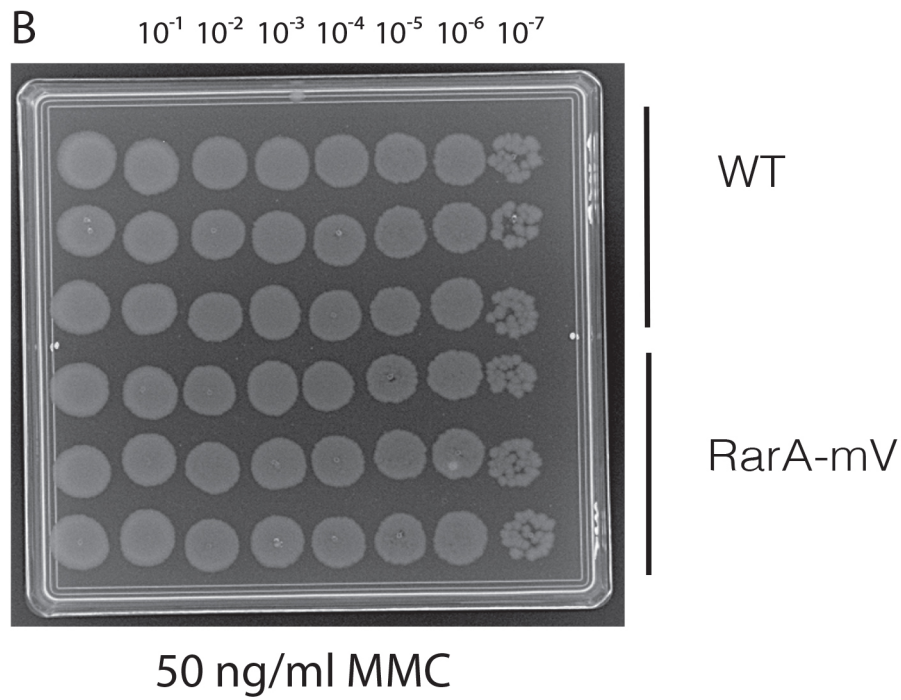

Fig. S2 Survival assays. (A) Chronic viability assay for the RarA-mVenus expressing strain. (B) Acute assay for survival of 60 minutes addition of MMC. Three independent colonies/assays are shown for wild type and for RarA-mVenus expressing cells.

Figure S3

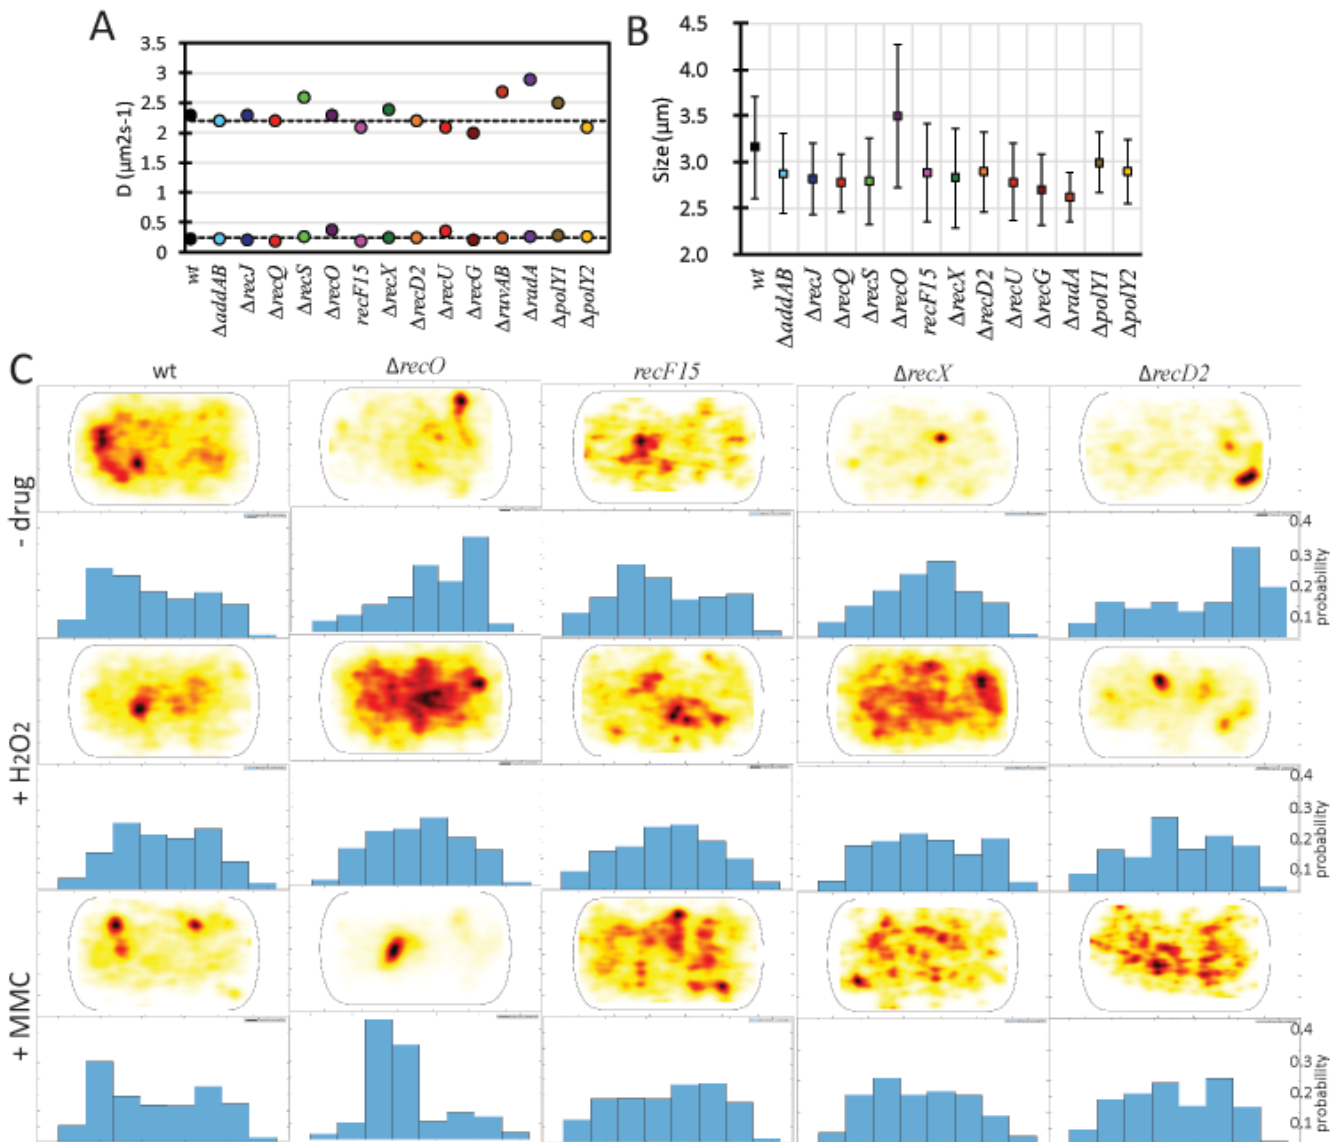

**Figure S3.** (A) Diffusion coefficients for static and dynamic populations calculated by Gaussian fit based in the step-size distribution. Values of each background were analysed separately, while dotted lines correspond to the analysis of all strains taken together. (B) Cell size considered prior to the normalization for the heat maps for the different backgrounds. (C) Heat maps and track distribution probability in X-axis for medium cells in the wild type,  $\Delta recO$ , *recF15*,  $\Delta recX$  and  $\Delta recD2$  in absence of DNA damage, or after induction with H<sub>2</sub>O<sub>2</sub> (0.5 mM) or MMC (50 ng/ml).

## References

- 1 Ceglowski, P., Luder, G. & Alonso, J. C. Genetic analysis of recE activities in *Bacillus subtilis*. *Mol Gen Genet* **222**, 441-445 (1990).
- 2 Fernandez, S., Kobayashi, Y., Ogasawara, N. & Alonso, J. C. Analysis of the *Bacillus subtilis* recO gene: RecO forms part of the RecFLOR function. *Mol Gen Genet* **261**, 567-573 (1999).
- 3 Alonso, J. C., Tailor, R. H. & Luder, G. Characterization of recombination-deficient mutants of *Bacillus subtilis*. *J Bacteriol* **170**, 3001-3007 (1988).
- 4 Torres, R., Romero, H., Rodriguez-Cerrato, V. & Alonso, J. C. Interplay between *Bacillus subtilis* RecD2 and the RecG or RuvAB helicase in recombinational repair. *DNA Repair (Amst)* **55**, 40-46, doi:10.1016/j.dnarep.2017.05.004 (2017).
- 5 Cardenas, P. P. *et al.* RecX facilitates homologous recombination by modulating RecA activities. *PLoS Genet* **8**, e1003126, doi:10.1371/journal.pgen.1003126 (2012).
- 6 Vlastic, I. *et al.* *Bacillus subtilis* RecA and its accessory factors, RecF, RecO, RecR and RecX, are required for spore resistance to DNA double-strand break. *Nucleic acids research* **42**, 2295-2307, doi:10.1093/nar/gkt1194 (2014).
- 7 Sanchez, H., Kidane, D., Cozar, M. C., Graumann, P. L. & Alonso, J. C. Recruitment of *Bacillus subtilis* RecN to DNA double-strand breaks in the absence of DNA end processing. *Journal of bacteriology* **188**, 353-360 (2006).
- 8 Fernandez, S., Sorokin, A. & Alonso, J. C. Genetic recombination in *Bacillus subtilis* 168: effects of recU and recS mutations on DNA repair and homologous recombination. *J Bacteriol* **180**, 3405-3409 (1998).
- 9 Sanchez, H., Carrasco, B., Cozar, M. C. & Alonso, J. C. *Bacillus subtilis* RecG branch migration translocase is required for DNA repair and chromosomal segregation. *Mol Microbiol* **65**, 920-935, doi:MMI5835 [pii] 10.1111/j.1365-2958.2007.05835.x (2007).
- 10 Sanchez, H. *et al.* The RuvAB branch migration translocase and RecU Holliday junction resolvase are required for double-stranded DNA break repair in *Bacillus subtilis*. *Genetics* **171**, 873-883, doi:genetics.105.045906 [pii] 10.1534/genetics.105.045906 (2005).
- 11 Gándara, C. & Alonso, J. C. DisA and c-di-AMP act at the intersection between DNA-damage response and stress homeostasis in exponentially growing *Bacillus subtilis* cells. *DNA repair* **27**, 1-8, doi:10.1016/j.dnarep.2014.12.007 (2015).
- 12 Raguse, M. *et al.* *Bacillus subtilis* DisA helps to circumvent replicative stress during spore revival. *DNA repair* **59**, 57-68, doi:10.1016/j.dnarep.2017.09.006 (2017).
- 13 Alonso, J. C., Stiege, C. A., Tailor, R. H. & Viret, J. F. Functional analysis of the dna (Ts) mutants of *Bacillus subtilis*: plasmid pUB110 replication as a model system. *Mol Gen Genet* **214**, 482-489 (1988).
- 14 Page, A. N., George, N. P., Marceau, A. H., Cox, M. M. & Keck, J. L. Structure and biochemical activities of *Escherichia coli* MgsA. *J. Biol. Chem.* **286**, 12075-12085, doi:10.1074/jbc.M110.210187 (2011).
